# Supplementary material for: A lighting robust fitting approach of 3D morphable model for face reconstruction
Source: Springer Nature journal article supplement (doi:10.1007/s00371-015-1158-z), 2015-09-21
Supplement: 371_2015_1158_MOESM1_ESM.pdf [file 371_2015_1158_MOESM1_ESM.pdf]

# *Supplementary Materials for* **A Lighting Robust Fitting Approach of 3D Morphable Model For Face Reconstruction**

Mingyang Ma · Silong Peng · Xiyuan Hu

Received: date / Accepted: date

## **1 Introduction**

The supplementary materials provide additional experiment. The details of comparison can be found in the body of submitted paper.

## List of Figures

|   |                                                                                                                                                                                                                                                                                                                                                                                                                                                            |    |
|---|------------------------------------------------------------------------------------------------------------------------------------------------------------------------------------------------------------------------------------------------------------------------------------------------------------------------------------------------------------------------------------------------------------------------------------------------------------|----|
| 1 | Comparison of accuracy of recovered shape. Rows from top to bottom, (a): input images; (b): Reconstruction result based on feature points [1]; (c): reconstruction of proposed approach; . . . . .                                                                                                                                                                                                                                                         | 4  |
| 2 | Comparison of robustness of proposed approach against pose variation. Columns (from left to right) show: (a) input images; (b) Novel pose by the method in[4] based on feature points; (c) Novel pose by the method in[4] based on the proposed approach. . . . .                                                                                                                                                                                          | 6  |
| 3 | Comparison of robustness of illumination model to lighting. Columns (from left to right) show: (a) input images; (b) fitting results given by Phong's model [3]; (c) fitting results given by the proposed approach without specular reflectance [2]; (d) fitting results given by the proposed approach. . . . .                                                                                                                                          | 7  |
| 4 | Comparison of the accuracy of shapes recovered from the first 11 frontal pose input in Fig. 3. Columns (from left to right) show: (a) novel pose given by Phong's model [3]; (b) novel pose given by the proposed approach without specular reflectance [2]; (c) novel pose given by the proposed approach; (d) contours of (a)(red line), (b)(green line) and (c)(blue line), respectively; (e) and (f) are the magnified details of column (d). . . . .  | 8  |
| 5 | Comparison of robustness of illumination model to lighting. Columns (from left to right) show: (a) input images; (b) fitting results given by Phong's model [3]; (c) fitting results given by the proposed approach without specular reflectance [2]; (d) fitting results given by the proposed approach. . . . .                                                                                                                                          | 9  |
| 6 | Comparison of the accuracy of shapes recovered from the first 11 frontal pose inputs in Fig. 5. Columns (from left to right) show: (a) novel pose given by Phong's model [3]; (b) novel pose given by the proposed approach without specular reflectance [2]; (c) novel pose given by the proposed approach; (d) contours of (a)(red line), (b)(green line) and (c)(blue line), respectively; (e) and (f) are the magnified details of column (d). . . . . | 10 |
| 7 | Comparison of robustness of illumination model to lighting. Columns from left to right: (a)input images; (b)fitting results given by the Phong's model [3]; (c)fitting results given by the proposed approach without specular[2]; (d): fitting results given by the proposed approach; . . . . .                                                                                                                                                          | 12 |
| 8 | Comparison of inferred frontal view from the 11 profile pose images in Fig. 7. Columns (from left to right) show: (a) inferred frontal view given by Phong's model [3]; (b) inferred frontal view given by the proposed approach without specular reflectance[2]; (c) inferred frontal view given by the proposed approach. . . . .                                                                                                                        | 13 |
| 9 | Comparison of robustness of illumination model to lighting. Columns from left to right: (a)input images; (b)fitting results given by the Phong's model [3]; (c)fitting results given by the proposed approach without specular[2]; (d): fitting results given by the proposed approach; . . . . .                                                                                                                                                          | 14 |

- 
- 10 Comparison of inferred frontal view from the 11 profile pose images in Fig. 9. Columns (from left to right) show: (a) inferred frontal view given by Phong’s model [3]; (b) inferred frontal view given by the proposed approach without specular reflectance[2]; (c) inferred frontal view given by the proposed approach. . . . . 15

## 2 Comparison with the feature points based approach

Here, we provide another comparison between our fitting results and the results based on features points [1].

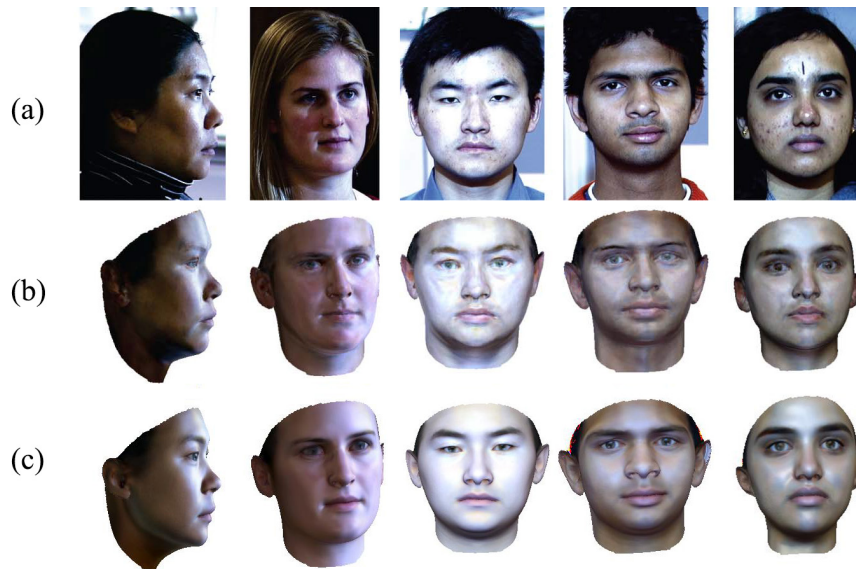

**Fig. 1** Comparison of accuracy of recovered shape. Rows from top to bottom, (a): input images; (b): Reconstruction result based on feature points [1]; (c): reconstruction of proposed approach;

### **3 New Profile View From Frontal Image**

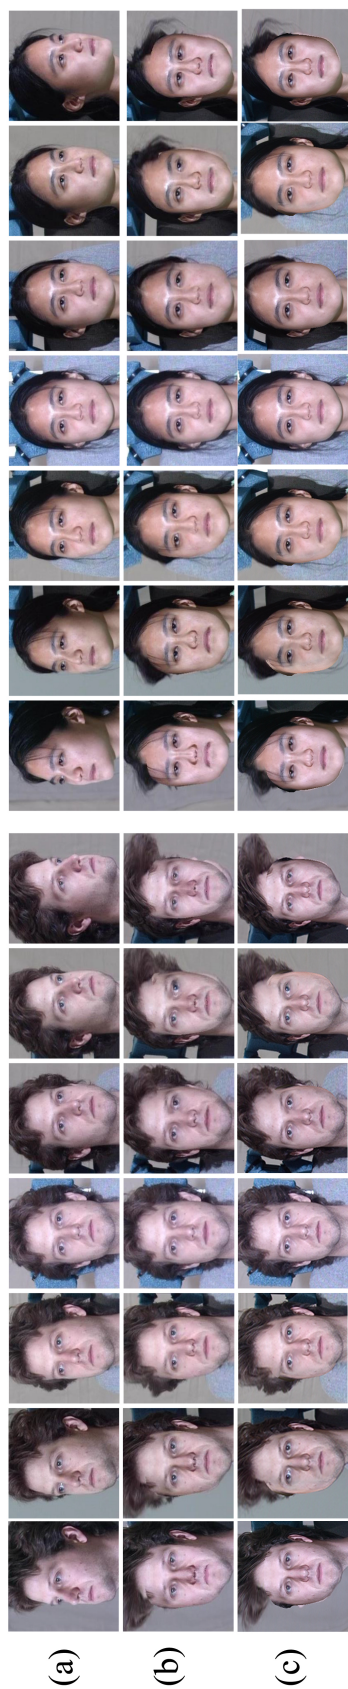

**Fig. 2** Comparison of robustness of proposed approach against pose variation. Columns (from left to right) show: (a) input images; (b) Novel pose by the method in[4] based on feature points; (c) Novel pose by the method in[4] based on the proposed approach.

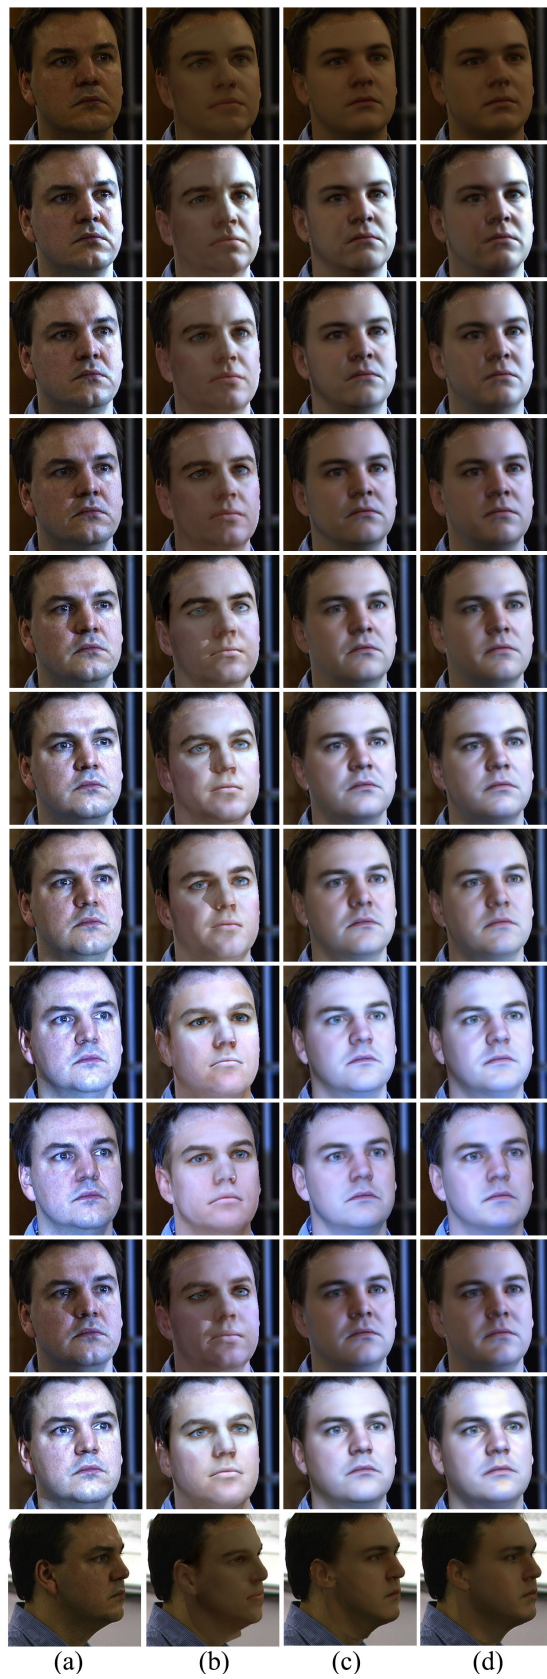

**Fig. 3** Comparison of robustness of illumination model to lighting. Columns (from left to right) show: (a) input images; (b) fitting results given by Phong's model [3]; (c) fitting results given by the proposed approach without specular reflectance [2]; (d) fitting results given by the proposed approach.

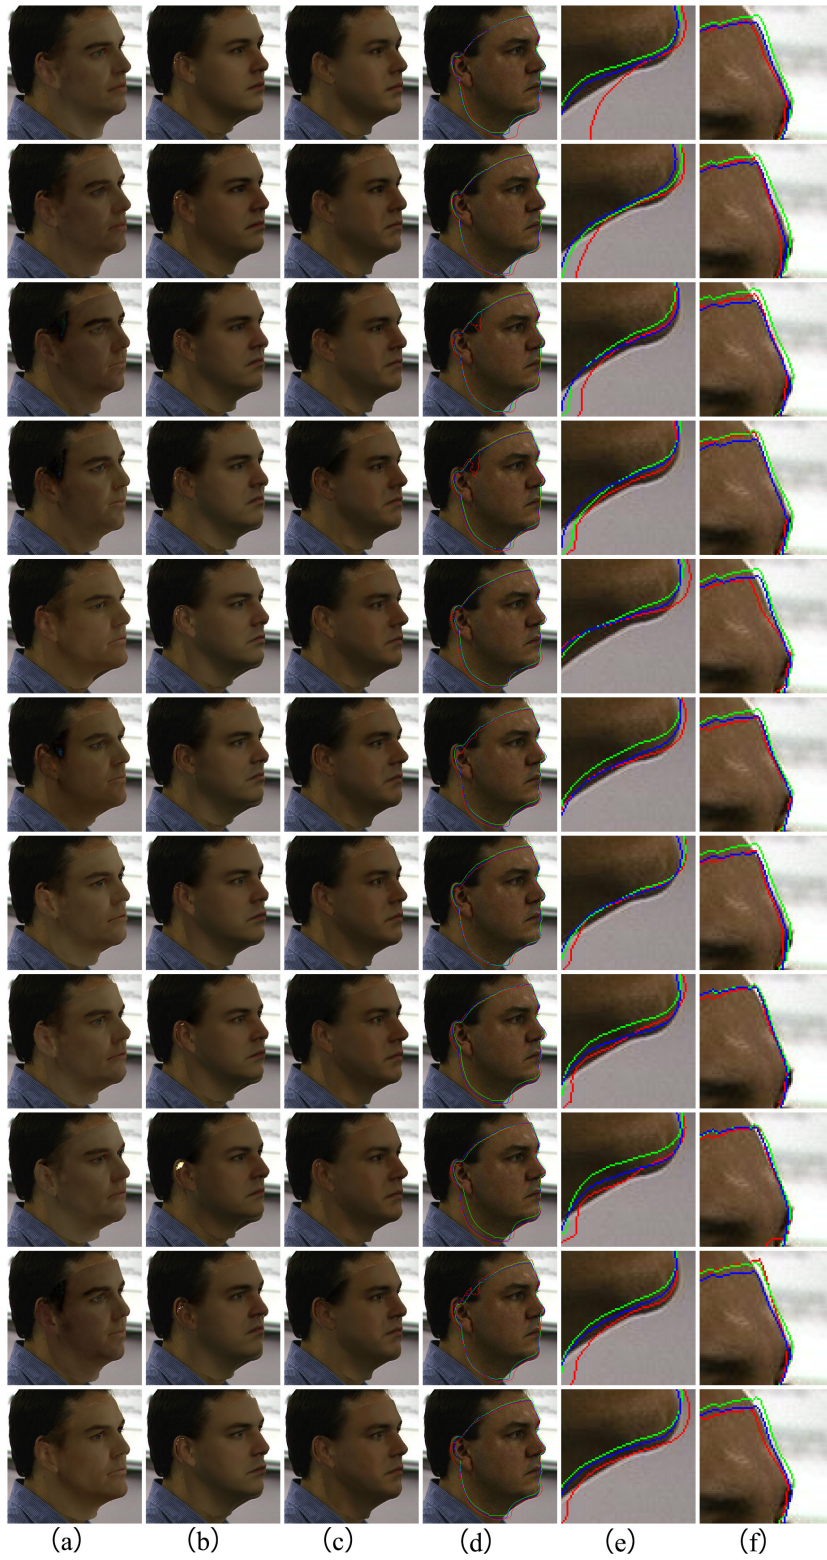

**Fig. 4** Comparison of the accuracy of shapes recovered from the first 11 frontal pose input in Fig. 3. Columns (from left to right) show: (a) novel pose given by Phong's model [3]; (b) novel pose given by the proposed approach without specular reflectance [2]; (c) novel pose given by the proposed approach; (d) contours of (a)(red line), (b)(green line) and (c)(blue line), respectively; (e) and (f) are the magnified details of column (d).



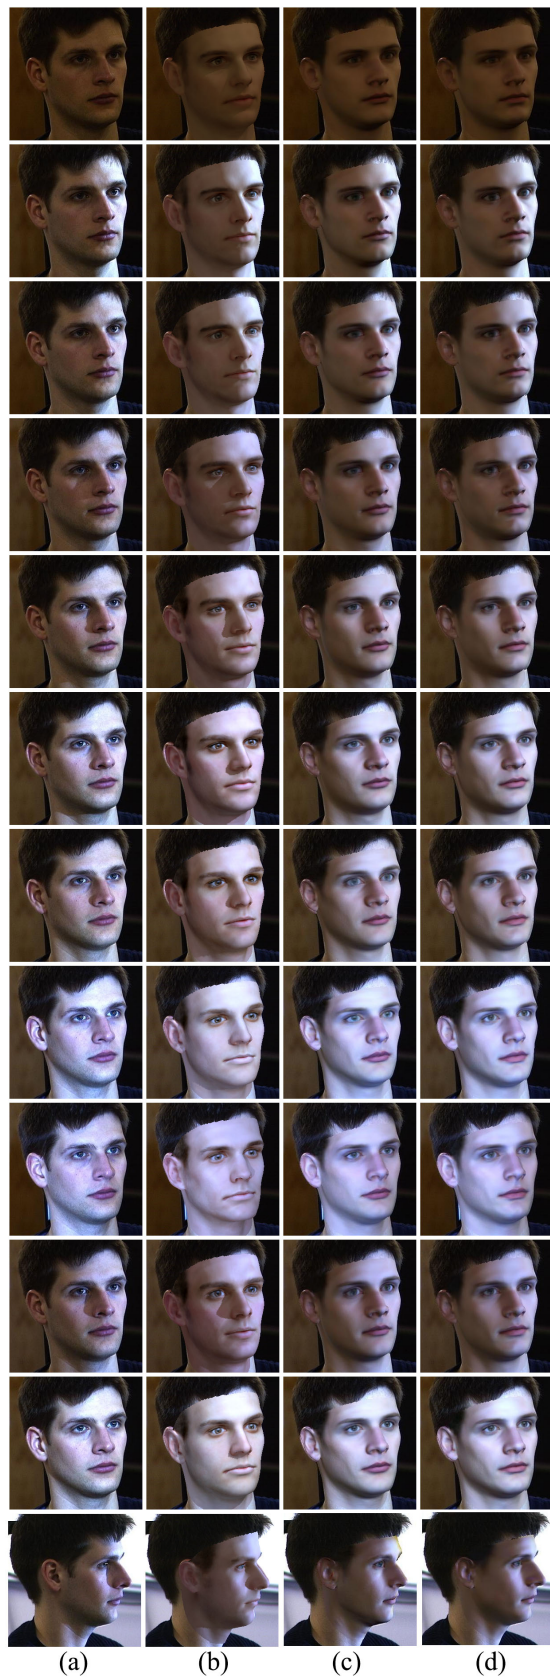

**Fig. 5** Comparison of robustness of illumination model to lighting. Columns (from left to right) show: (a) input images; (b) fitting results given by Phong's model [3]; (c) fitting results given by the proposed approach without specular reflectance [2]; (d) fitting results given by the proposed approach.

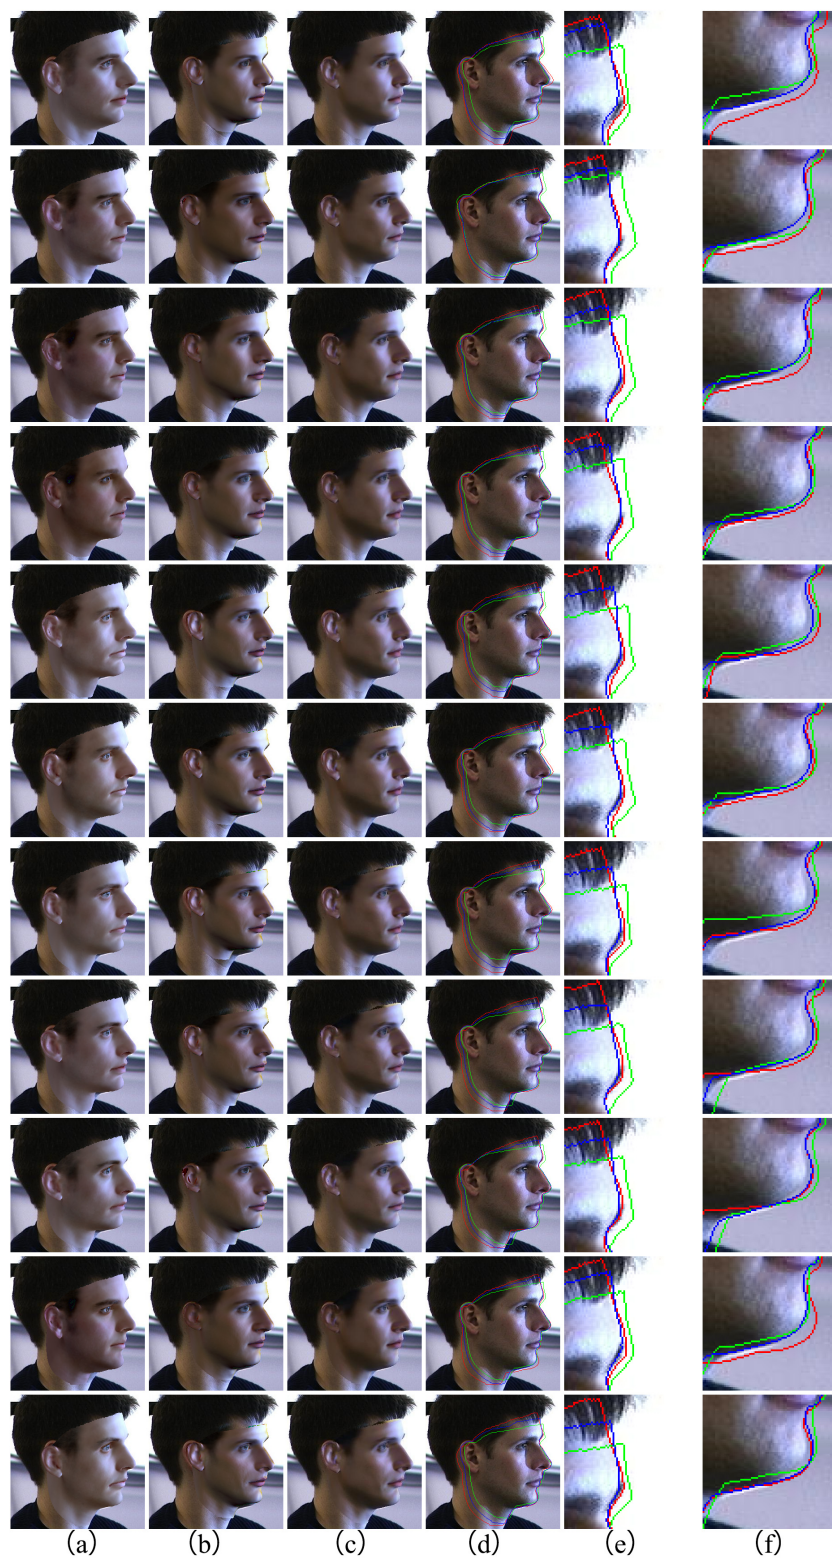

**Fig. 6** Comparison of the accuracy of shapes recovered from the first 11 frontal pose inputs in Fig. 5. Columns (from left to right) show: (a) novel pose given by Phong’s model [3]; (b) novel pose given by the proposed approach without specular reflectance [2]; (c) novel pose given by the proposed approach; (d) contours of (a)(red line), (b)(green line) and (c)(blue line), respectively; (e) and (f) are the magnified details of column (d).

#### **4 Inferred Frontal View From Profile Image**

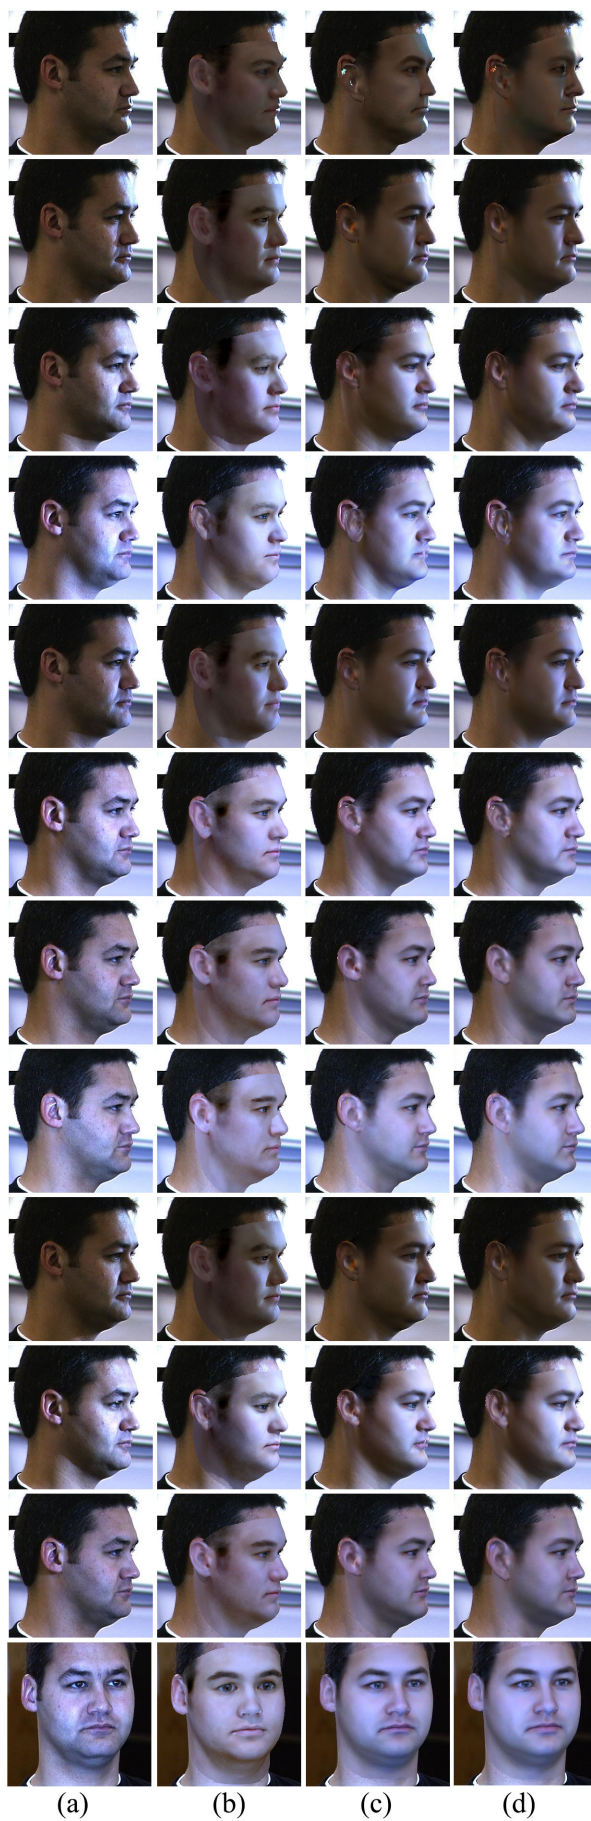

**Fig. 7** Comparison of robustness of illumination model to lighting. Columns from left to right: (a)input images; (b)fitting results given by the Phong's model [3]; (c)fitting results given by the proposed approach without specular[2]; (d): fitting results given by the proposed approach;

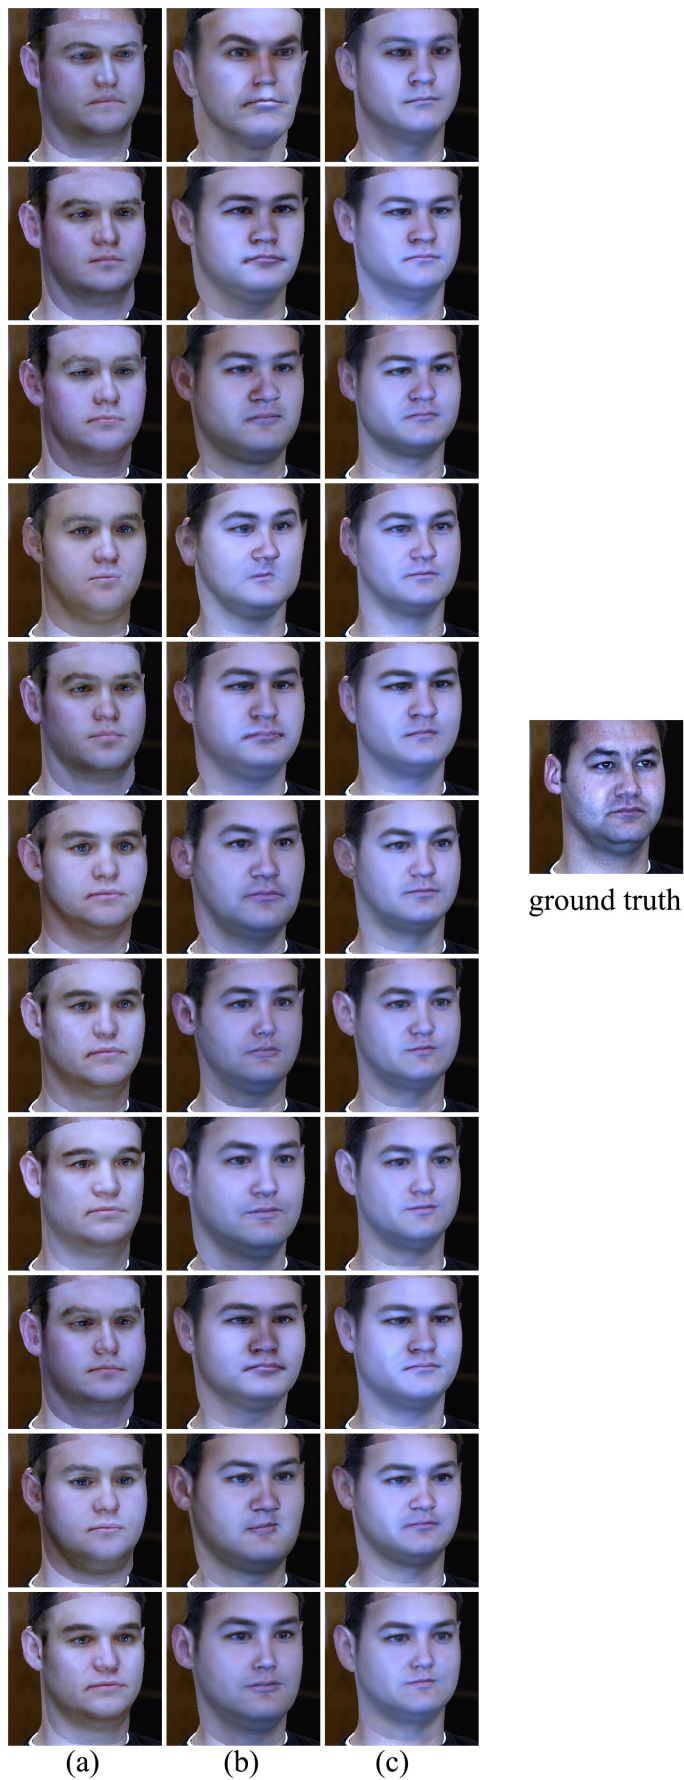

**Fig. 8** Comparison of inferred frontal view from the 11 profile pose images in Fig. 7. Columns (from left to right) show: (a) inferred frontal view given by Phong's model [3]; (b) inferred frontal view given by the proposed approach without specular reflectance[2]; (c) inferred frontal view given by the proposed approach.

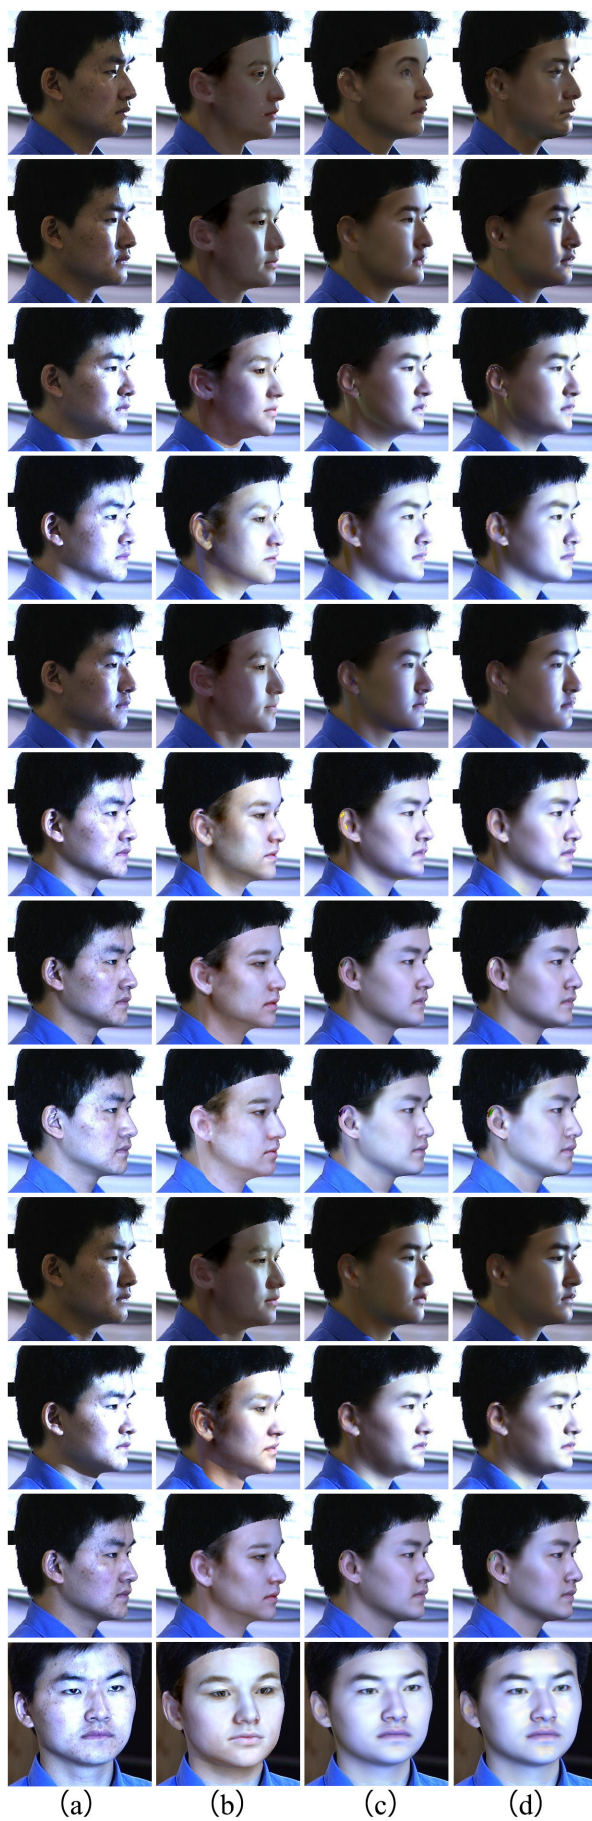

**Fig. 9** Comparison of robustness of illumination model to lighting. Columns from left to right: (a)input images; (b)fitting results given by the Phong's model [3]; (c)fitting results given by the proposed approach without specular[2]; (d): fitting results given by the proposed approach;

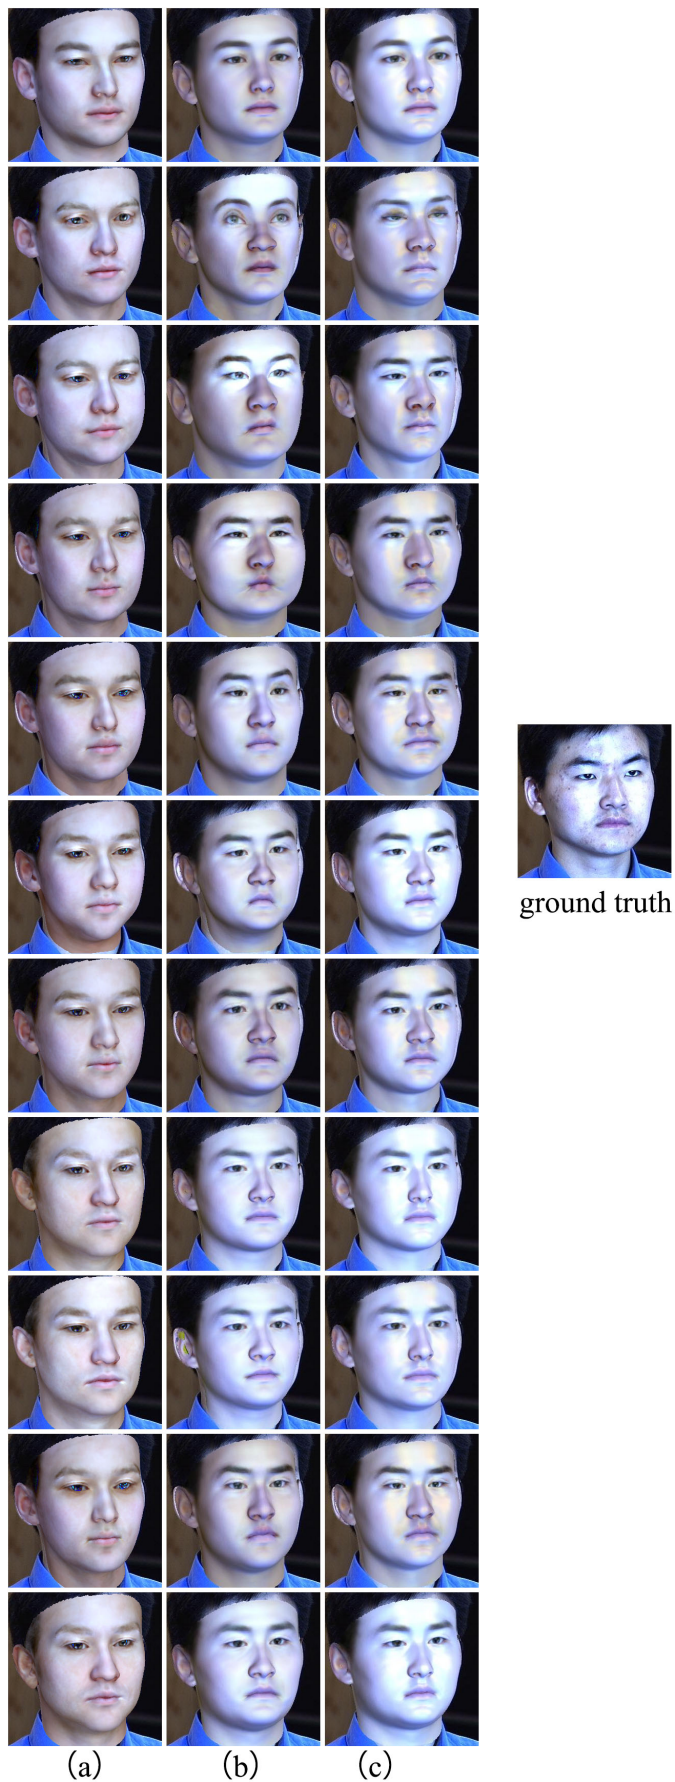

**Fig. 10** Comparison of inferred frontal view from the 11 profile pose images in Fig. 9. Columns (from left to right) show: (a) inferred frontal view given by Phong's model [3]; (b) inferred frontal view given by the proposed approach without specular reflectance[2]; (c) inferred frontal view given by the proposed approach.

---

## References

1. Aldrian, O., Smith, W.: Inverse rendering of faces with a 3d morphable model. *IEEE Trans. Pattern Anal. Mach. Intell* **35**(5), 1080–1093 (2013)
2. Mingyang, M., Xiyuan, H., Yuquan, X., Silong, P.: A lighting robust fitting approach of 3d morphable model using spherical harmonic illumination. In: 22nd International Conference on Pattern Recognition (ICPR), pp. 2101 – 2106 (2014)
3. Paysan, P., Knothe, R., Amberg, B., Romdhani, S., Vetter, T.: A 3d face model for pose and illumination invariant face recognition. In: Sixth IEEE International Conference on Advanced Video and Signal Based Surveillance(AVSS), pp. 296–301. IEEE Computer Society (2009)
4. Xiangyu, Z., Zhen, L., Junjie, Y., Dong, Y., Li., S.Z.: High-fidelity pose and expression normalization for face recognition in the wild. In: The IEEE Conference on Computer Vision and Pattern Recognition (CVPR), pp. 1–10 (2015)
